# Supplementary material for: Effect of Dietary Brown Seaweed (Macrocystis pyrifera) Additive on Meat Quality and Nutrient Composition of Fattening Pigs
Source: MDPI journal article supplement (doi:10.3390/foods10081720), 2021-07-26
Supplement: s1 [file s1]

**Supplementary Table S1.** Descriptive statistics for fatty acids composition (\*) and health index in pork *longissimus lumborum* muscle.

| Variable                  | Mean  | SD    | Minimum | Maximum |
|---------------------------|-------|-------|---------|---------|
| C14:0                     | 1.37  | 0.14  | 1.04    | 1.54    |
| C16:0                     | 23.80 | 1.09  | 22.45   | 26.44   |
| C18:0                     | 13.23 | 1.49  | 10.66   | 16.04   |
| C20:0                     | 0.003 | 0.006 | 0.001   | 0.003   |
| C22:0                     | 0.06  | 0.02  | 0.03    | 0.1     |
| $\Sigma$ SFA <sup>1</sup> | 39.96 | 2.39  | 36.11   | 44.19   |
| C14:1                     | 0.012 | 0.004 | 0.01    | 0.02    |
| C16:1                     | 2.51  | 0.86  | 0.03    | 3.98    |
| C17:1                     | 0.19  | 0.05  | 0.09    | 0.30    |
| C18:1 $\omega$ 9          | 43.93 | 2.09  | 40.65   | 48.17   |
| C20:1 $\omega$ 9          | 0.04  | 0.02  | 0.01    | 0.07    |
| $\Sigma$ MUFA             | 48.80 | 2.46  | 45.51   | 53.21   |
| C18:3 $\omega$ 3          | 0.47  | 0.11  | 0.33    | 0.64    |
| C20:5 $\omega$ 3          | 1.24  | 0.40  | 0.67    | 2.15    |
| C18:2 $\omega$ 6          | 2.11  | 1.51  | 6.11    | 10.99   |
| C20:4 $\omega$ 6          | 0.66  | 0.07  | 0.57    | 0.77    |
| C18:3 $\omega$ 3          | 0.47  | 0.11  | 0.33    | 0.64    |
| $\Sigma$ $\omega$ 3       | 1.71  | 0.38  | 1.09    | 2.55    |
| $\Sigma$ $\omega$ 6       | 0.65  | 0.07  | 0.51    | 0.77    |
| $\Sigma$ PUFA             | 10.76 | 1.77  | 8.39    | 13.70   |
| Total trans               | 1.99  | 0.55  | 0.68    | 2.97    |
| H/h                       | 0.46  | 0.037 | 0.40    | 0.54    |
| IA                        | 0.56  | 0.04  | 0.49    | 0.68    |
| IT                        | 0.18  | 0.14  | 0.98    | 1.52    |
| MUFA/SFA                  | 1.22  | 0.12  | 1.03    | 1.46    |
| PUFA/SFA                  | 0.27  | 0.05  | 0.9     | 0.35    |
| $\omega$ 6/ $\omega$ 3    | 0.41  | 0.11  | 0.27    | 0.62    |

\*:values are expressed as g/100 g of fresh muscular tissue. SD: Standard Deviation. CV: Coef Sum of Saturated Fatty Acids. <sup>2</sup>:Sum of Monounsaturated Fatty Acids. <sup>3</sup>:Sum of Polyunsaturated Fatty Acids. H/h=hypercholesterolemic/hypocholesterolemic index: (C14:0+C16:0)/ (C18:1+C18:2+C18:3- C20:5+C22:4+C22:5+C22:6). IA = Atherogenic index: (C12:0 + 4  $\times$  C14:0 + C16:0 / $\Sigma$ AGMI IT = Thrombogenic index: (C14:0 + C16:0 + C18:0)/[0,5  $\times$   $\Sigma$ AGMI + 0,5  $\times$   $\Sigma$ ( $\omega$ -6) + 3  $\times$   $\Sigma$ ( $\omega$ -3)]

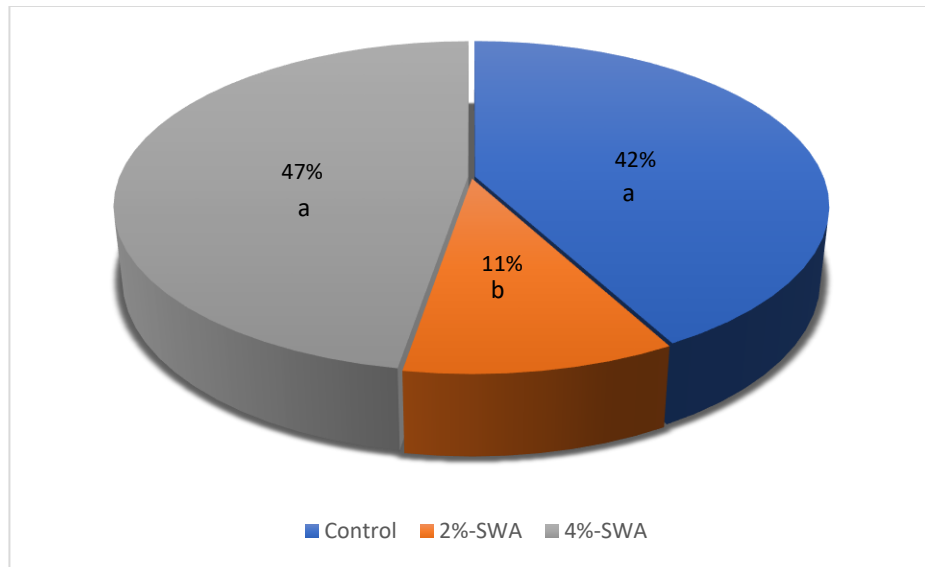

**Figure S1.** Taste preference percentage by panelists.  $\chi^2$  test. Different letters indicate significant different ( $P < 0.05$ ) among group's frequencies.
